# Supplementary material
Source: PubMed Central journal article supplement (PMC4770550)
Supplement: NIHMS758382-supplement.pdf [file NIHMS758382-supplement.pdf]

## **e-Supplement 1. Pediatric Eye Disease Investigator Group**

### **Clinical Sites**

Sites are listed in order by number of participants enrolled. Personnel are listed as (I) for Investigator or (C) for Coordinator.

\*Center received support utilized for this project from an unrestricted grant from Research to Prevent Blindness Inc., New York, New York.

#### **Montreal, Quebec - CHU - Sainte-Justine (5)**

Rosanne Superstein, (I); Maryse Thibeault, (C)

#### **San Francisco, CA - University of California San Francisco, Dept. of Ophthalmology (5)**

Alejandra de Alba Campomanes, (I); Jacquelyn D. Kemmer, (C); Alexandra E. Neiman, (C)

#### **Minneapolis, MN - University of Minnesota (4)\***

Erick D. Bothun, (I); Ann M. Holleschau, (C)

#### **Chicago Ridge, IL - The Eye Specialists Center, L.L.C. (3)**

Benjamin H. Ticho, (I); Deborah A. Clausius, (C); Sharon L. Giers, (C)

#### **Salt Lake City, UT - Rocky Mountain Eye Care Associates (2)**

David B. Petersen, (I); Tori S. Pickens, (C); J. Ryan McMurtrey, (C)

#### **Saint Paul, MN - Associated Eye Care (1)**

Susan Schloff, (I); Rebecca A. Wolf, (C)

#### **Boston, MA - Boston Medical Center (1)**

Stephen P. Christiansen, (I); Kate H. McConnell, (C); Amy N. Hopwood, (C); Vanessa C. Vazquez, (C)

#### **Philadelphia, PA – Children’s Hospital of Philadelphia (1)**

Brian J. Forbes, (I); Gil Binenbaum, (I); Karen A. Karp, (C); Suzanne McCullough, (C)

#### **Poland, OH - Eye Care Associates, Inc. (1)**

Sergul A. Erzurum, (I); Diana McOwen, (C); Beth J. Colon, (C)

#### **Boise, ID - St Luke’s Hospital (1)**

Katherine A. Lee, (I); Bonita R. Schweinler, (C)

#### **Atlanta, GA - The Emory Eye Center (1)\***

Scott R. Lambert, (I); Judy L. Brower, (C); Marla J. Shainberg, (C)

**Nashville, TN - Vanderbilt Eye Center (1)\***

Sean P. Donahue, (I); Lisa A. Fraine, (C)

**West Des Moines, IA - Wolfe Clinic (1)**

Myra N. Mendoza, (I); Donny W. Suh, (I); Jill J. Frohwein, (C); Jody L. Jackson, (C); Lisa M. Fergus (C)

**PEDIG Coordinating Center**

Raymond T. Kraker, Roy W. Beck, Nicole M. Boyle, Christina M. Cagnina-Morales, Courtney L. Conner, Danielle L. Chandler, Trevano W. Dean, Quayleen Donahue, Brooke P. Fimbel, James E. Hoepner, Joseph D. Kaplon, Elizabeth L. Lazar, B. Michele Melia, Rachel V. Orłowski, Diana E. Rojas, Jennifer A. Shah

**National Eye Institute – Bethesda, MD**

Donald F. Everett

**E02 (Botox) Planning Committee**

Stephen P. Christiansen (chair), Gil Binenbaum, Eileen E. Birch, Erick D. Bothun, Danielle L. Chandler, Alejandra de Alba Campomanes, Sarah R. Hatt, Jonathan M. Holmes, Raymond T. Kraker, David A. Leske, B. Michele Melia, Aaron M. Miller, David G. Morrison, Michael X. Repka,, David I. Silbert, Benjamin H. Ticho, Veda L. Zeto

**Strabismus Steering Committee**

Eileen E. Birch, Danielle L. Chandler, Stephen P. Christiansen (2013-14), Susan A. Cotter, Sean P. Donahue, Sarah R. Hatt, Jonathan M. Holmes, Darren L. Hoover (2010-14), Lingkun Kong (2012-14), Raymond T. Kraker, Elizabeth L. Lazar, Ingrid J. Lorenzana (2014-present), B. Michele Melia, Brian G. Mohny, Karen Pollack (2014-present), Michael X. Repka, Mitchell M. Scheiman (2010-14), Rosanne Superstein (2013-14), Susanna M. Tamkins (2009-14), David K. Wallace, Tomohiko Yamada (2014-present)

**PEDIG Executive Committee**

David K. Wallace (chair), William F. Astle (2013-present), Roy W. Beck, Eileen E. Birch, Angela M. Chen (2012-14), Melanie L. Christian (2012-14), Susan A. Cotter (2009-14), Earl R. Crouch Jr. (2012-14), Eric R. Crouch III (2014-present), Sean P. Donahue (2012-14), Laura B. Enyedi (2011-13, 2014-present), Donald F. Everett, Jonathan M. Holmes, Darren L. Hoover (2011-13), Raymond T. Kraker, Scott R. Lambert (2013-present), Katherine A. Lee (2014-present), Ruth E. Manny (2013-present), David B. Petersen (2011- 13), Michael X. Repka, David L. Rogers (2011-13), Jayne L. Silver (2014-present), Katherine K. Weise (2014-present)

**PEDIG Data and Safety Monitoring Committee**

Marie Diener-West (chair), John D. Baker, Barry Davis, Donald F. Everett, Dale L. Phelps, Stephen W. Poff, Richard A. Saunders, Lawrence Tychsen
